# Supplementary material for: First Line Systemic Treatment for MALT Lymphoma—Do We Still Need Chemotherapy? Real World Data from the Medical University Vienna
Source: MDPI journal article supplement (doi:10.3390/cancers12123533), 2020-11-26
Supplement: s1 [file s1]

# Supplementary Materials: First Line Systemic Treatment for MALT Lymphoma – Do We Still Need Chemotherapy? Real World Data From the Medical University Vienna

Barbara Kiesewetter, Ingrid Simonitsch-Klupp, Marius E Mayerhoefer, Werner Dolak, Julius Lukas and Markus Raderer

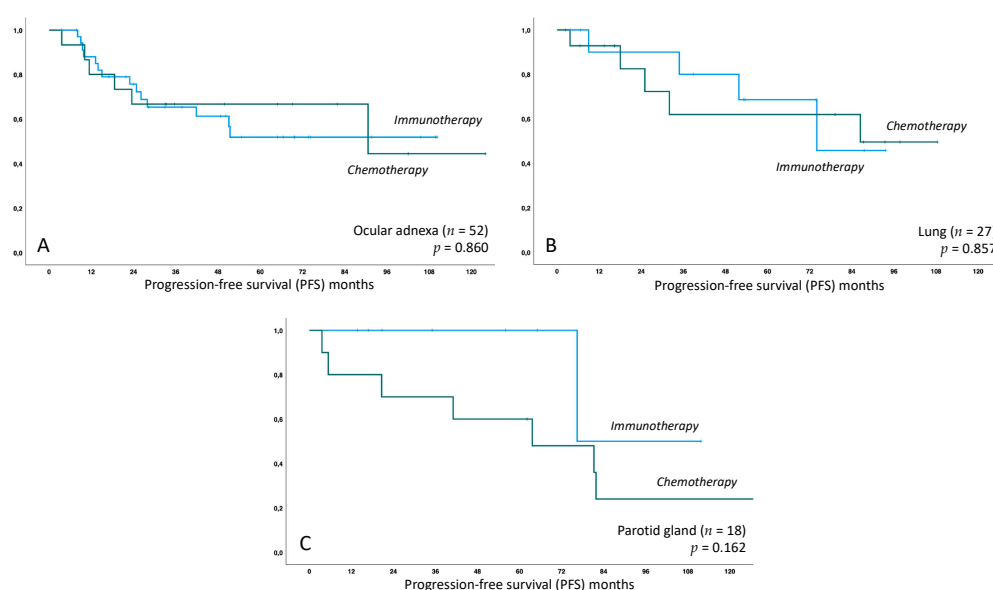

**Figure S1.** Kaplan-Meier curve for estimated progression-free survival in MALT lymphoma patients treated with immunotherapy versus chemotherapy for further common primary localizations: (A) ocular adnexal MALT lymphoma patients; (B) pulmonary MALT lymphoma patients; (C) parotid gland MALT lymphoma patients. X-axis follow-up in months, Y-axis cumulative progression-free survival.

**Table S1.** Univariate analysis for PFS and OS according to clinical features.

| <b>Clinical Features</b>      | <b>P-Value<br/>PFS</b> | <b>P-Value<br/>OS</b> |
|-------------------------------|------------------------|-----------------------|
| Sex (female /male)            | <i>p</i> = 0.568       | <i>p</i> = 0.936      |
| Age 70+                       | <i>p</i> = 0.613       | <i>p</i> = 0.022      |
| MALT-IPI > 0                  | <i>p</i> = 0.614       | <i>p</i> = 0.119      |
| Gastric versus extragastric   | <i>p</i> = 0.196       | <i>p</i> = 0.654      |
| Localized versus disseminated | <i>p</i> = 0.163       | <i>p</i> = 0.129      |
| Autoimmune disorder           | <i>p</i> = 0.078       | <i>p</i> = 0.740      |
| LDH > ULN                     | <i>p</i> = 0.010       | <i>p</i> = 0.331      |
| Performance status > 1        | <i>p</i> = 0.492       | <i>p</i> = 0.024      |
| Plasmacytic diff.             | <i>p</i> = 0.912       | <i>p</i> = 0.390      |
| Beta2-microglobulin > ULN     | <i>p</i> = 0.981       | <i>p</i> = 0.010      |
| Paraproteinemia               | <i>p</i> = 0.379       | <i>p</i> = 0.009      |
| Viral hepatitis               | <i>p</i> = 0.211       | <i>p</i> = 0.500      |

Italics indicate significance. *Abbreviations in chronological order:* PFS = progression-free survival; OS = overall survival; MALT = mucosa associated lymphoid tissue lymphoma; IPI = international prognostic index; LDH = lactate dehydrogenase; ULN = upper limit of normal; diff. = differentiation.

**Publisher's Note:** MDPI stays neutral with regard to jurisdictional claims in published maps and institutional affiliations.

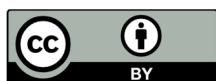

© 2020 by the author. Licensee MDPI, Basel, Switzerland. This article is an open access article distributed under the terms and conditions of the Creative Commons Attribution (CC BY) license (<http://creativecommons.org/licenses/by/4.0/>).
